# Supplementary material
Source: PubMed Central journal article supplement (PMC5111815)
Supplement: NIHMS818424-supplement-S1-S14__Table_S1-S3.pdf [file NIHMS818424-supplement-S1-S14__Table_S1-S3.pdf]

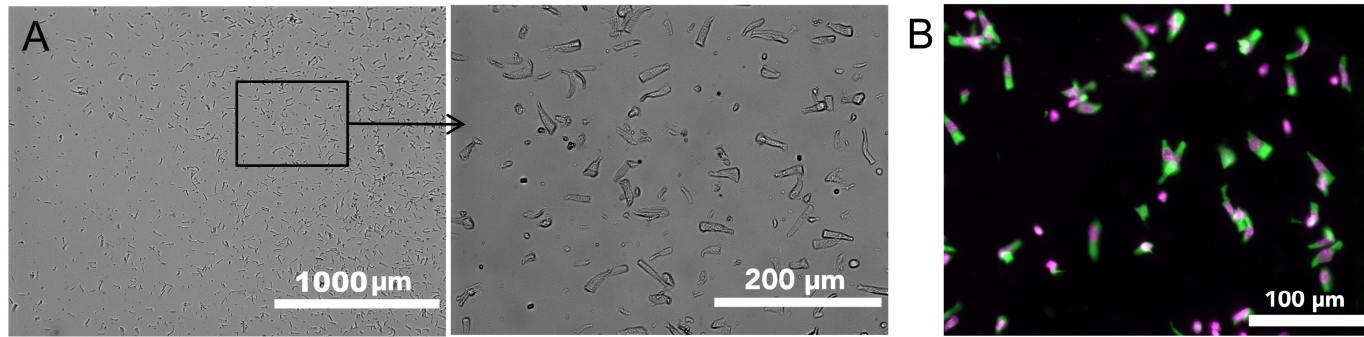

**Fig. S1. Imaging of single cell suspensions prepared by FFPE-DISSECT from embedded mouse intestinal tissue by brightfield and autofluorescence. (A)** Brightfield imaging of whole columnar epithelial cells isolated as single cells. **(B)** Fluorescence imaging of column epithelial cells as single cells using Hoescht (nuclei - magenta) and autofluorescence (green). Images are representative of 3 experiments. Scale bars as indicated.

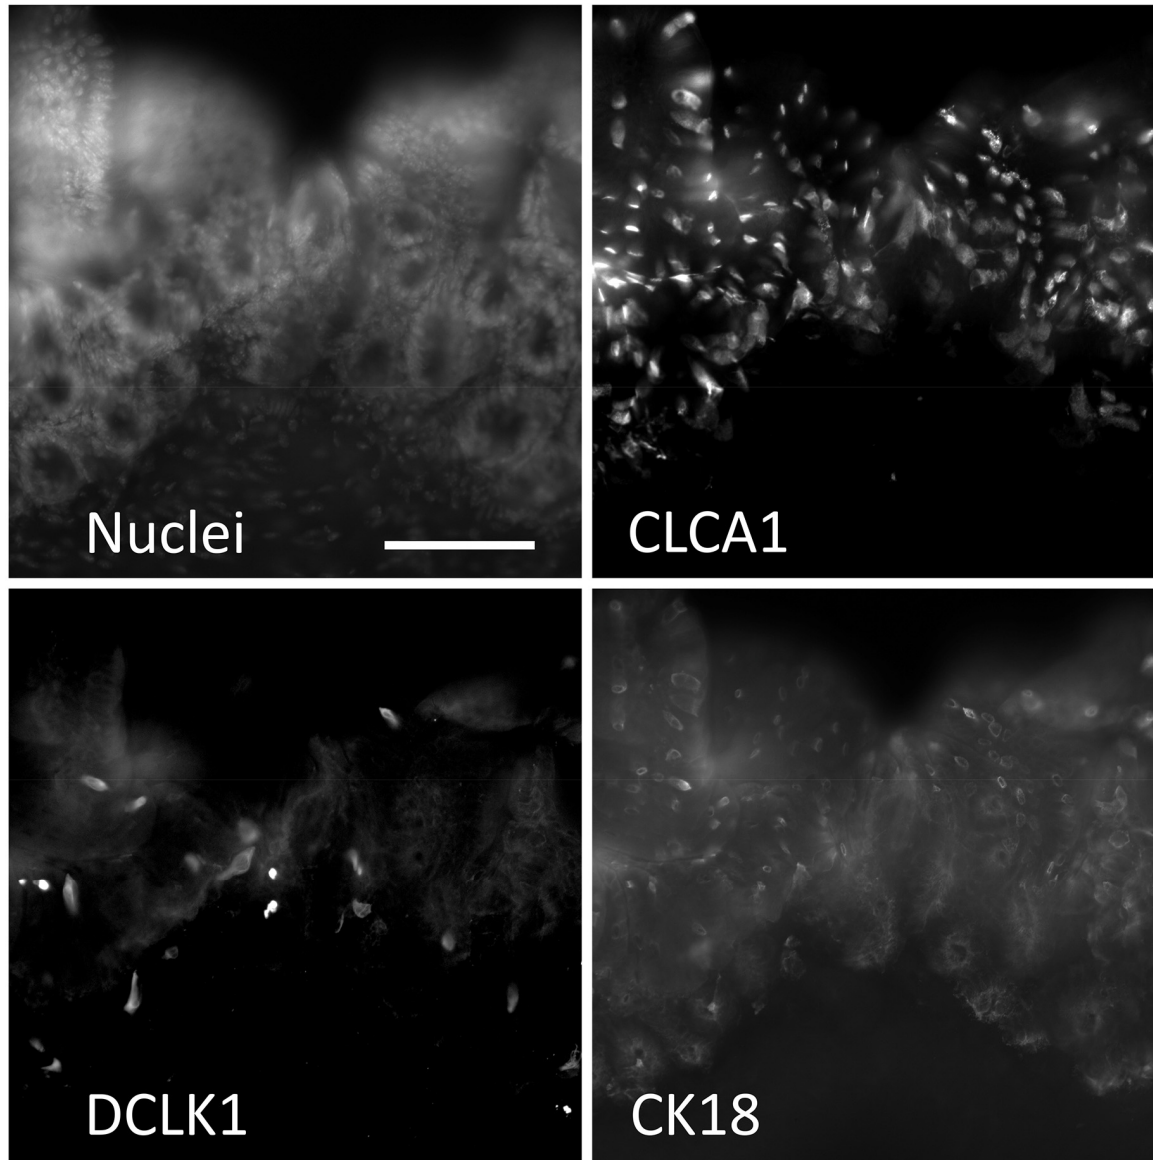

**Fig. S2. Whole mount staining of embedded mouse intestinal tissue prepared by FFPE-DISSECT before single cell disaggregation.** Whole mount immunofluorescence staining for cell type markers (CK18, CLCA1, DCLK1). Images are representative of 3 experiments. Scale bars, 100  $\mu\text{m}$ .

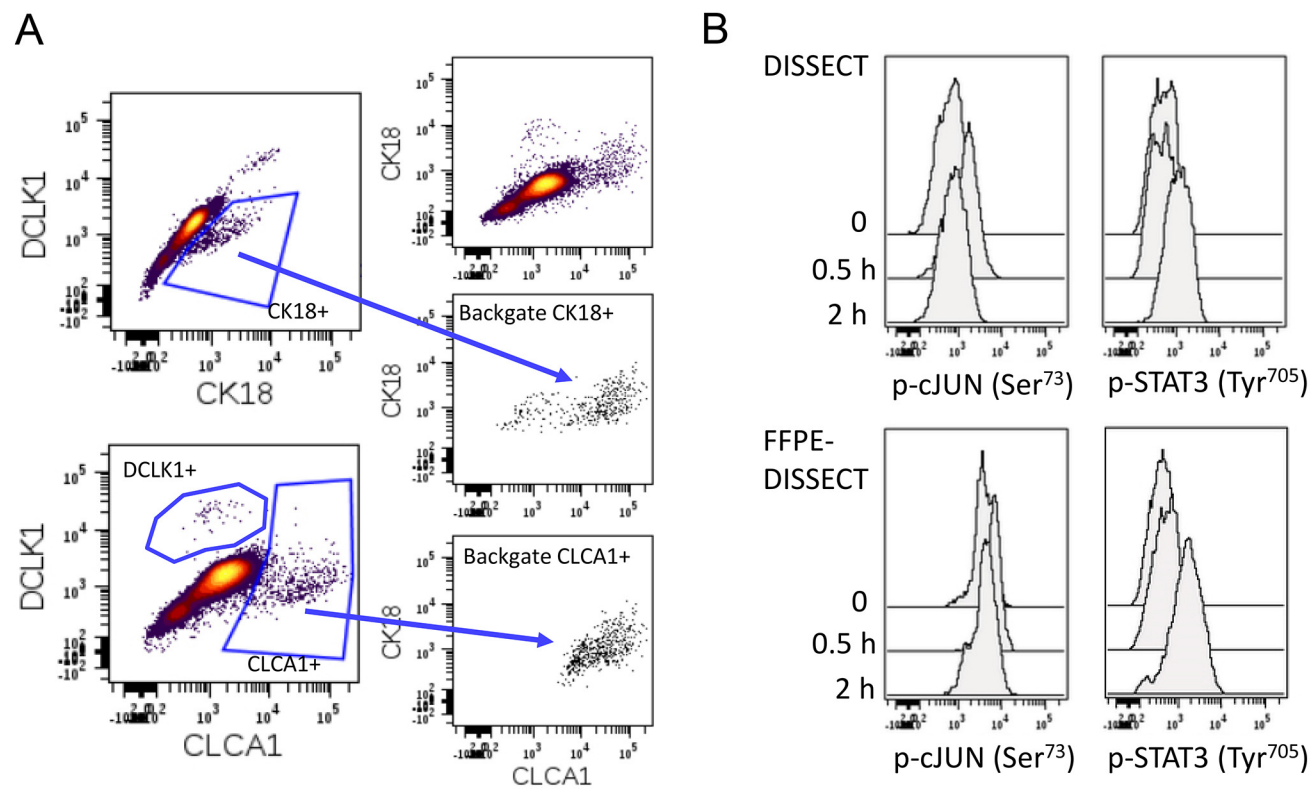

**Fig. S3. Fluorescence cytometry of samples prepared by FFPE-DISSECT. (A)** Flow cytometry bi-plots of the mouse duodenum prepared by FFPE-DISSECT. Manual gating of goblet cells by CK18 and CLCA1, and tuft cells by DCLK1. CK18 and CLCA1 singular positive cells are back-gated to a bi-axial plot not used for the original gating to demonstrate that the cells comprise an overlapping goblet cell population. **(B)** Phospho-flow analysis of p-cJUN (early signal) and p-STAT3 (late signal) of the murine duodenum in response to TNF- $\alpha$  at specified time points. Single cells were prepared either immediately by DISSECT, or FFPE-embedded and then by FFPE-DISSECT. Data are representative of 3 experiments.

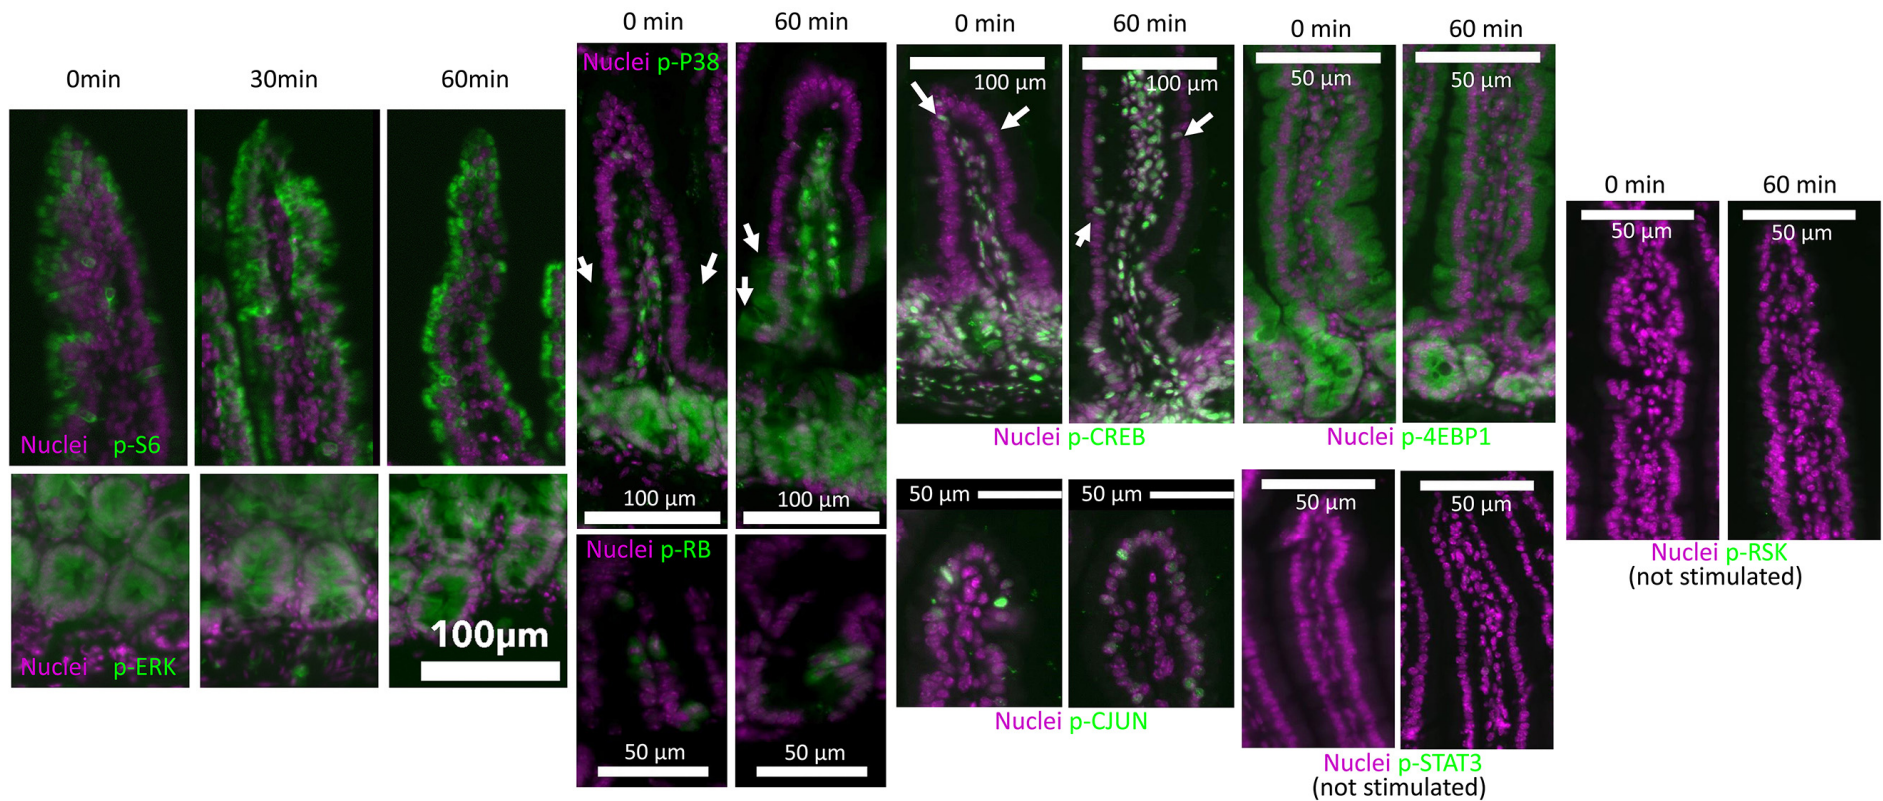

**Fig. S4. Signals are preserved for up to 1 hour post-excision.** Immunofluorescence imaging of basal signals for all phospho-protein signaling markers used in the human study (Table S3) in FFPE murine tissues with a post-excision time of up to one hour for simulating possible tissue preparation conditions in the human study. Murine duodenal tissues were harvested, and then either fixed immediately, or stored in RPMI for 30 or 60 minutes (as per Cooperative Human Tissue Network standard operating procedure) prior to fixation and FFPE processing. Crypts, villi, or both displayed according to signal localization. Arrows represent individual positive cells. Images are representative of 3 experiments. Scale bars as indicated.

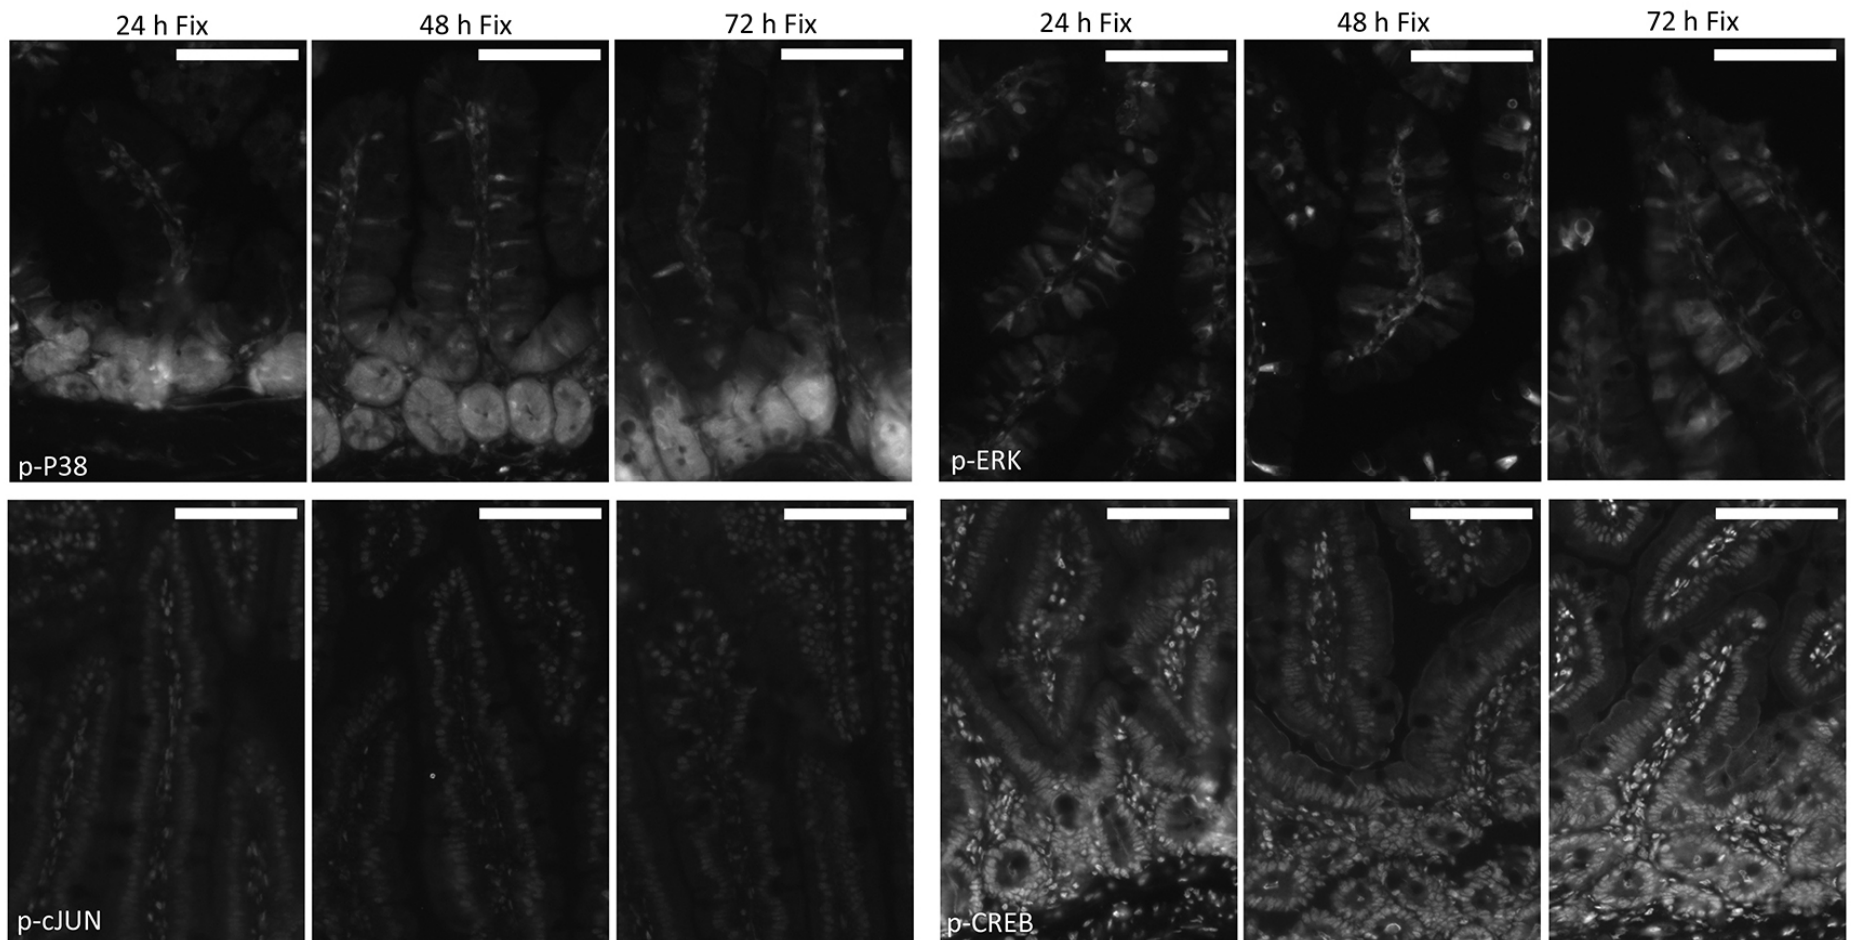

**Fig. S5. Fixation time does not affect signaling marker detection in FFPE.** Immunofluorescence imaging of murine duodenal tissues stimulated by TNF $\alpha$  for 30 mins that were in fixative for the indicated time. Representative cytoplasmic (p-P38, p-ERK) and nuclear (p-cJUN, p-CREB) signals from 3 experiments. Scale bars, 100  $\mu$ m.

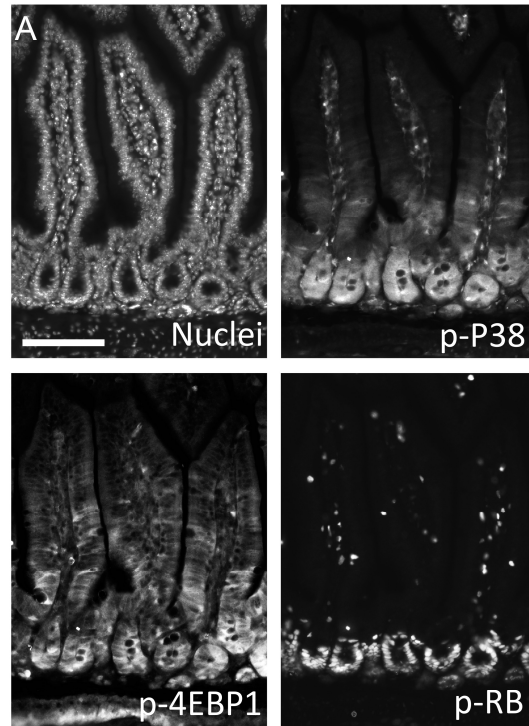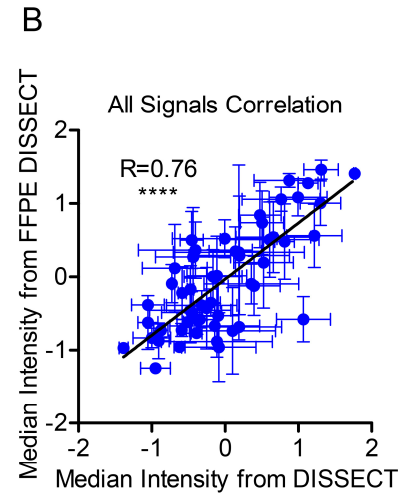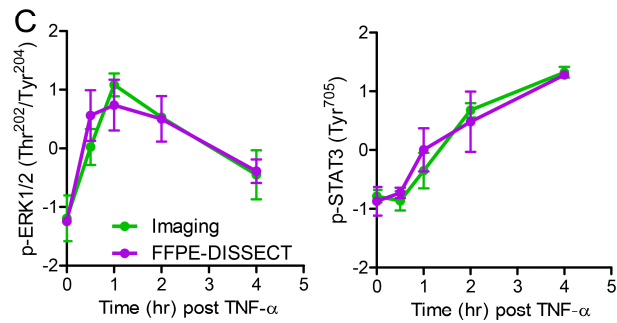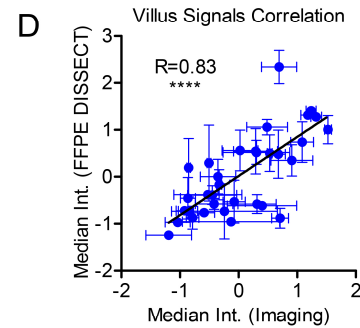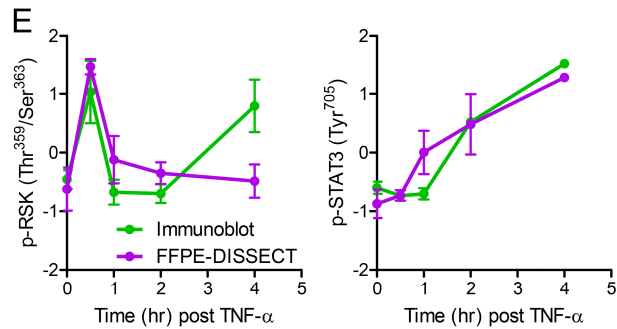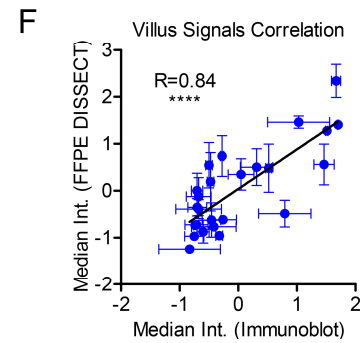

**Fig. S6. Villus signal comparison between FFPE-DISSECT, quantitative imaging, quantitative immunoblotting. (A)**

Immunofluorescence imaging of p-P38, p-4EBP1, p-RB at baseline without stimulation in murine duodenal FFPE sections. Scale bars, 100  $\mu$ m. **(B)** Correlation analysis combining all signaling markers (both villus and crypt), comparing mass cytometry data generated by DISSECT against FFPE-DISSECT. **(C)** Quantitative comparisons of measurements obtained by immunofluorescent imaging of FFPE tissue sections versus FFPE-DISSECT-mass cytometry on two different cohorts of mice. Duodenal tissues were used. Representative of early (p-ERK) and late (p-STAT3) signals. **(D)** Correlation analysis of combined villus signaling markers (CC3, p-STAT3, p-cJUN, p-ATF2, p-CREB, p-ERK, p-S6), comparing immunofluorescent imaging data against mass cytometry data generated by FFPE-DISSECT. **(E)** Quantitative comparisons of measurements obtained by immunoblotting using fresh tissue versus FFPE-DISSECT-mass cytometry on two different cohorts of mice. Duodenal tissues were used. Representative of early (p-RSK) and late (p-STAT3) signals. **(F)** Correlation analysis of combined villus signaling markers (p-RSK, CC3, p-STAT3, p-ERK, p-S6), comparing immunoblotting data against mass cytometry data generated by FFPE-DISSECT. Error bars represent SEM from n=3 animals. Data scales are Z-score values derived from mean centering and variance scaling of each set of time course experiment. \*\*\*\* P  $\leq$  0.0001 from t-test.

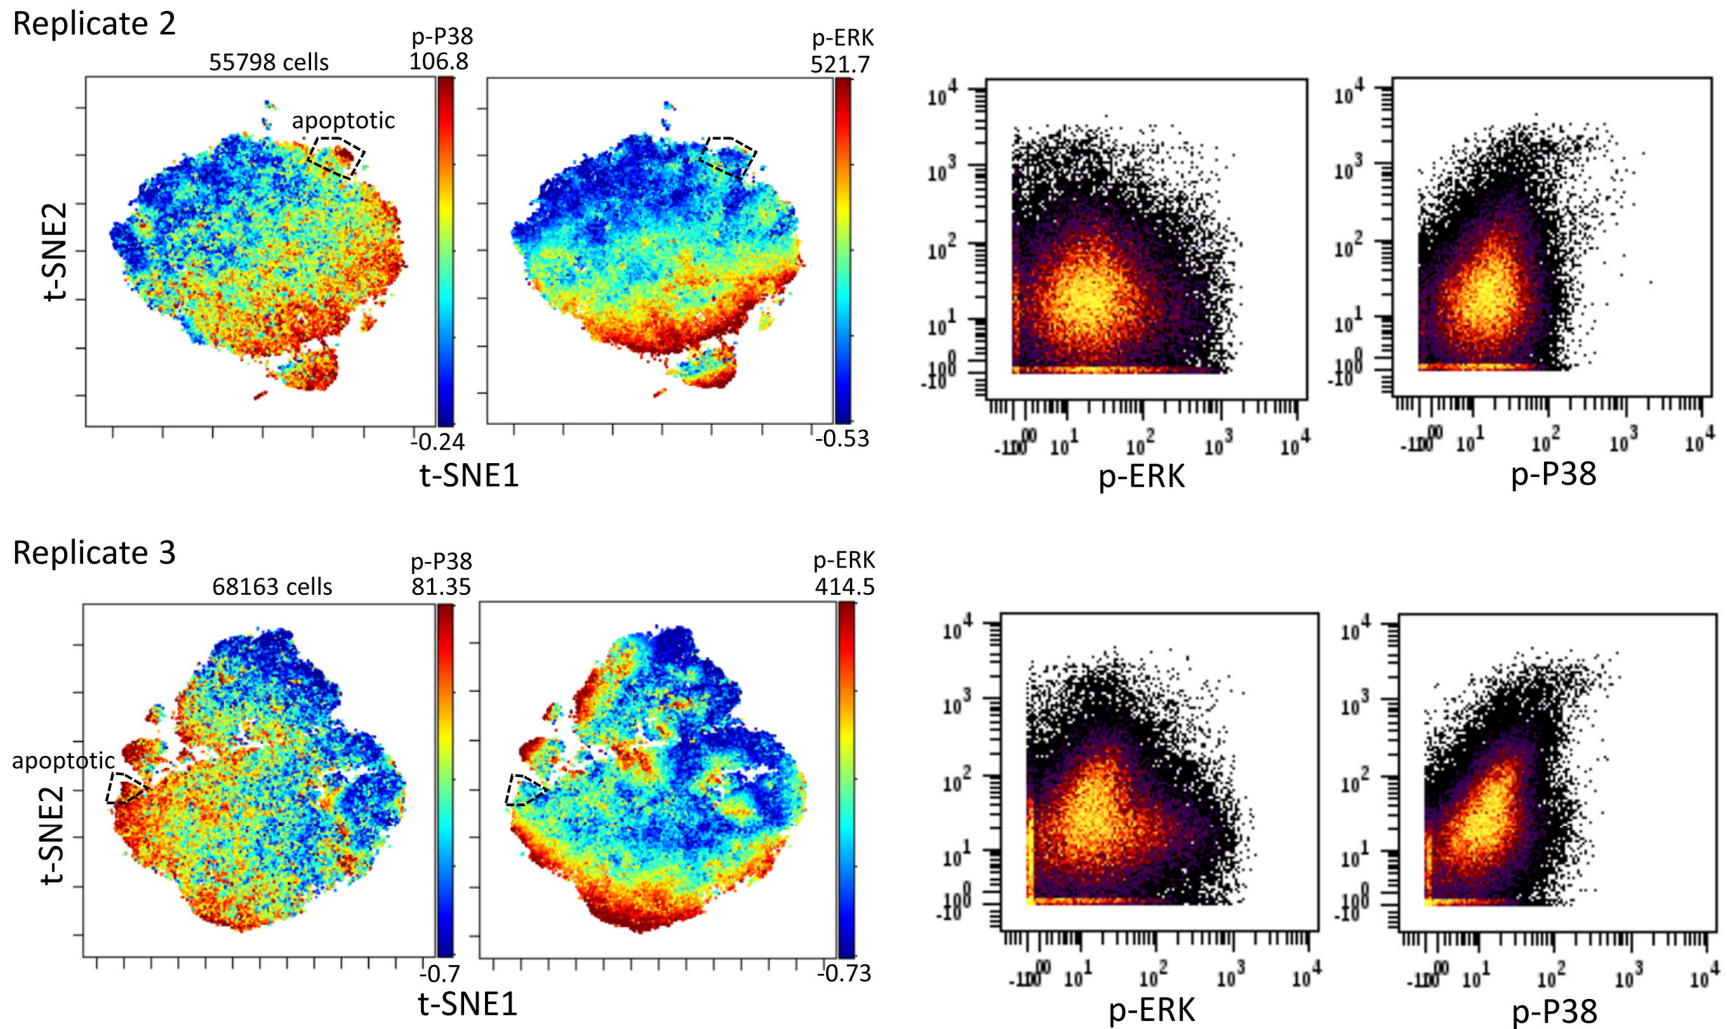

**Fig. S7. Replicates over multiple animals depicting relationships between apoptosis and signaling pathways using t-SNE and bi-plots.** t-SNE analysis of mass cytometry data from the mouse duodenum exposed to TNF- $\alpha$  for 1 hr, prepared by FFPE-DISSECT. Color overlaid represents the relative quantification of cleaved caspase 3, p-ERK, and p-P38 events, respectively. Labelled cells: apoptotic – CC3+ (A) 2.07%, (B) 2.09%. Numbers on right axis represent min and max value of the color scale. Data representative of n=3 animals (see Fig. 4A, B).



**A**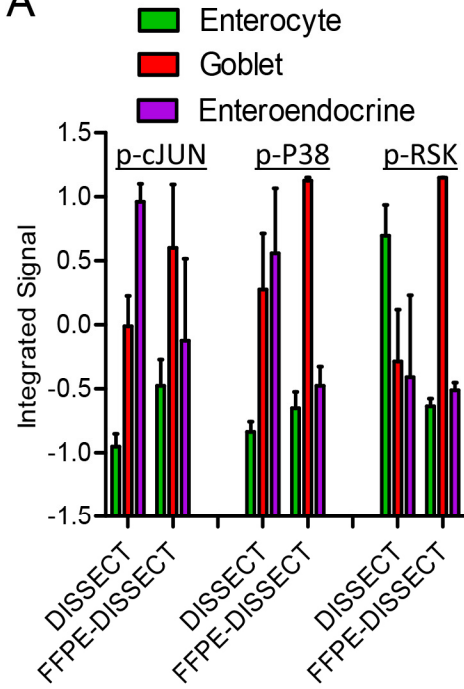**B**Goblet cells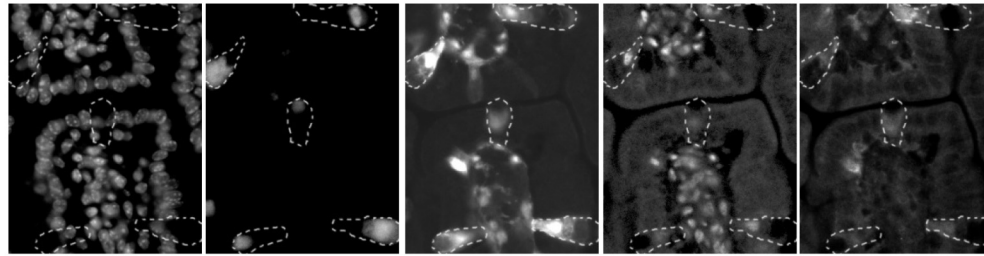

Nuclei MUC2 p-ERK p-ATF2 p-4EBP1

Enteroendocrine cells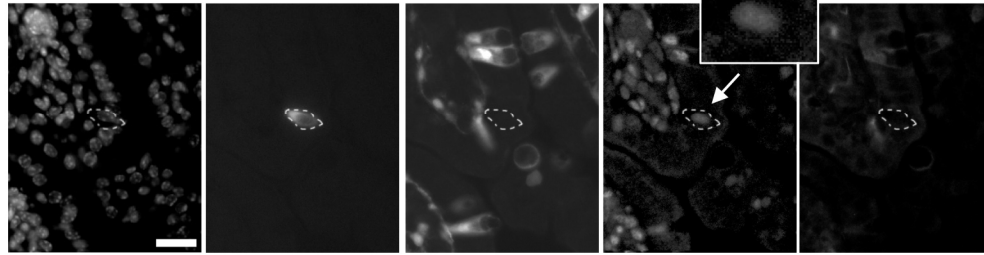

Nuclei CHGA p-ERK p-ATF2 p-4EBP1

**C**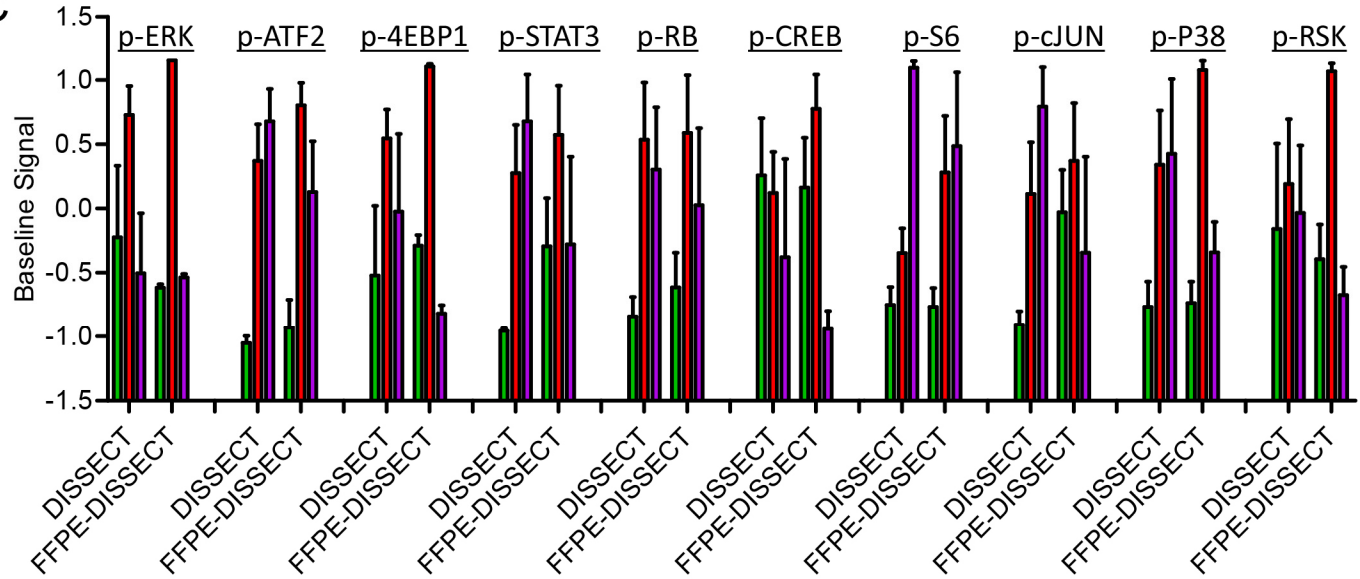

**Fig. S8. Cell type-specific signaling in the murine duodenal epithelium. (A)** A subset of signals specific to epithelial cell types (enterocyte- CK20+, CLCA1-, CHGA-, goblet – CLCA1+, enteroendocrine – CHGA+) calculated by integrating signal values over the entire TNF- $\alpha$  time course, comparing mass cytometry data generated by DISSECT against FFPE-DISSECT. **(B)** Replicate IF imaging to confirm cell type-specific signals (p-ERK, p-ATF2, p-4EBP1) at baseline. Scale bars, 20  $\mu$ m. **(C)** Baseline signals specific to epithelial cell types, comparing mass cytometry data generated by DISSECT against FFPE-DISSECT. Error bars represent SEM from n=3 animals, and data scales are Z-score values derived from mean centering and variance scaling over data values for the three cell types for each method.

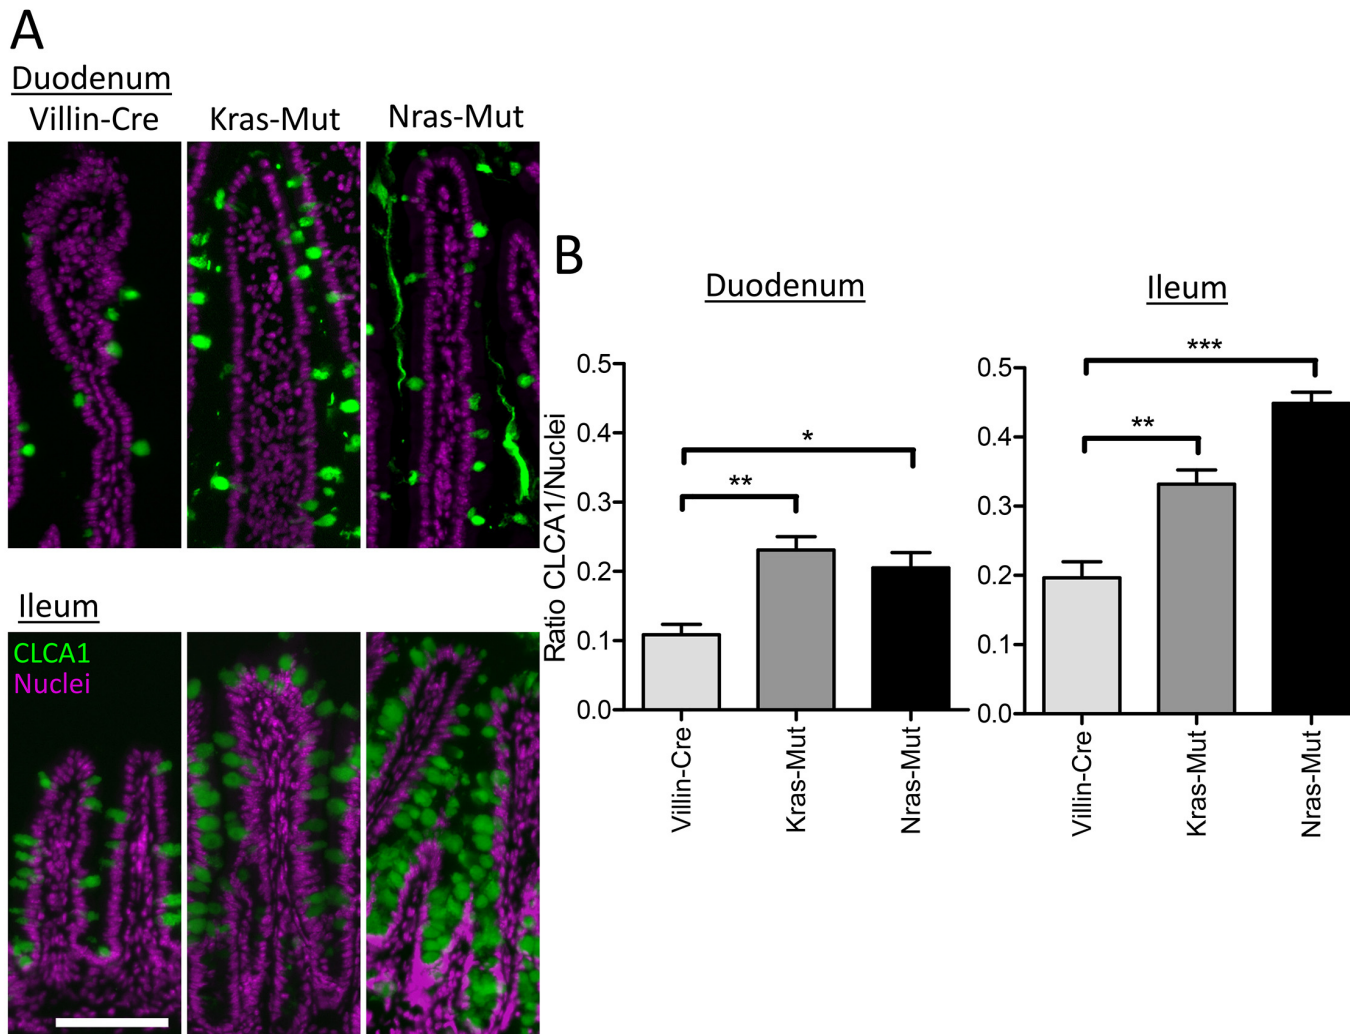

**Fig. S9. RAS induction of MEK-ERK signaling induces goblet cell identity.** (A) Immunofluorescence imaging of goblet cells by CLCA1 staining in *Villin-Cre*<sup>+/+</sup> control (Villin-Cre), *Villin-Cre*<sup>+/+</sup>; *KRas*<sup>LSL-G12D/+</sup> (Kras-Mut), and *Villin-Cre*<sup>+/+</sup>; *NRas*<sup>LSL-G12D/+</sup> (Nras-Mut) murine duodenal and ileal epithelial. (B) Quantification of the ratio of area occupied by CLCA1 staining versus nuclear staining in the villus (with a correction factor for the size of a goblet granule against the size of a nucleus). Scale bars, 100  $\mu$ m. Error bars represent SEM from n=3 animals.

MSS *KRAS* WT (33473)

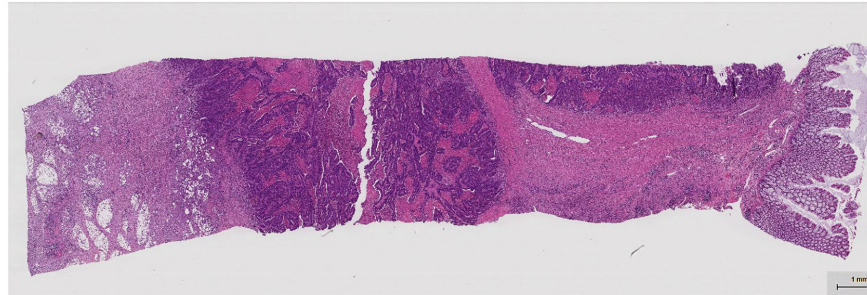

MSS *KRAS* Mut (33482)

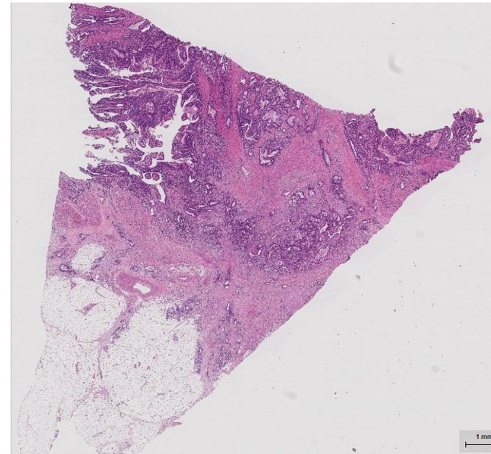

MSI *BRAF* WT (33476)

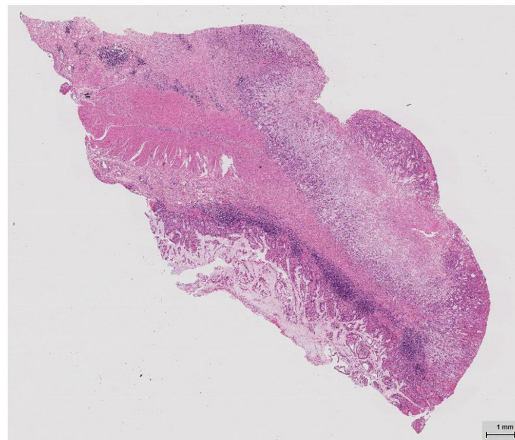

MSI *BRAF* Mut (33471)

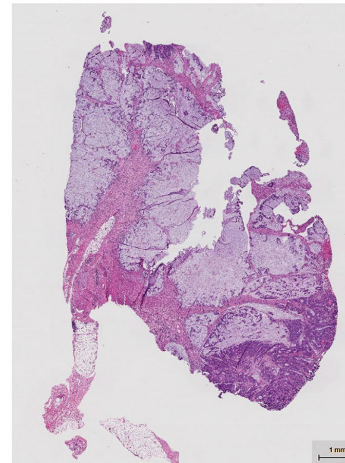

**Fig. S10. Hematoxylin and eosin of MSS and MSI CRCs showing tissue areas occupied by tumors.** Low magnification view of tumor sections from FFPE blocks for representative MSS and MSI CRC with or without mutant *KRAS* or *BRAF*, respectively. Scale bars, 1 mm. Data representative of n>6 human patient samples for each group (MSS-CRC, MSI-CRC).

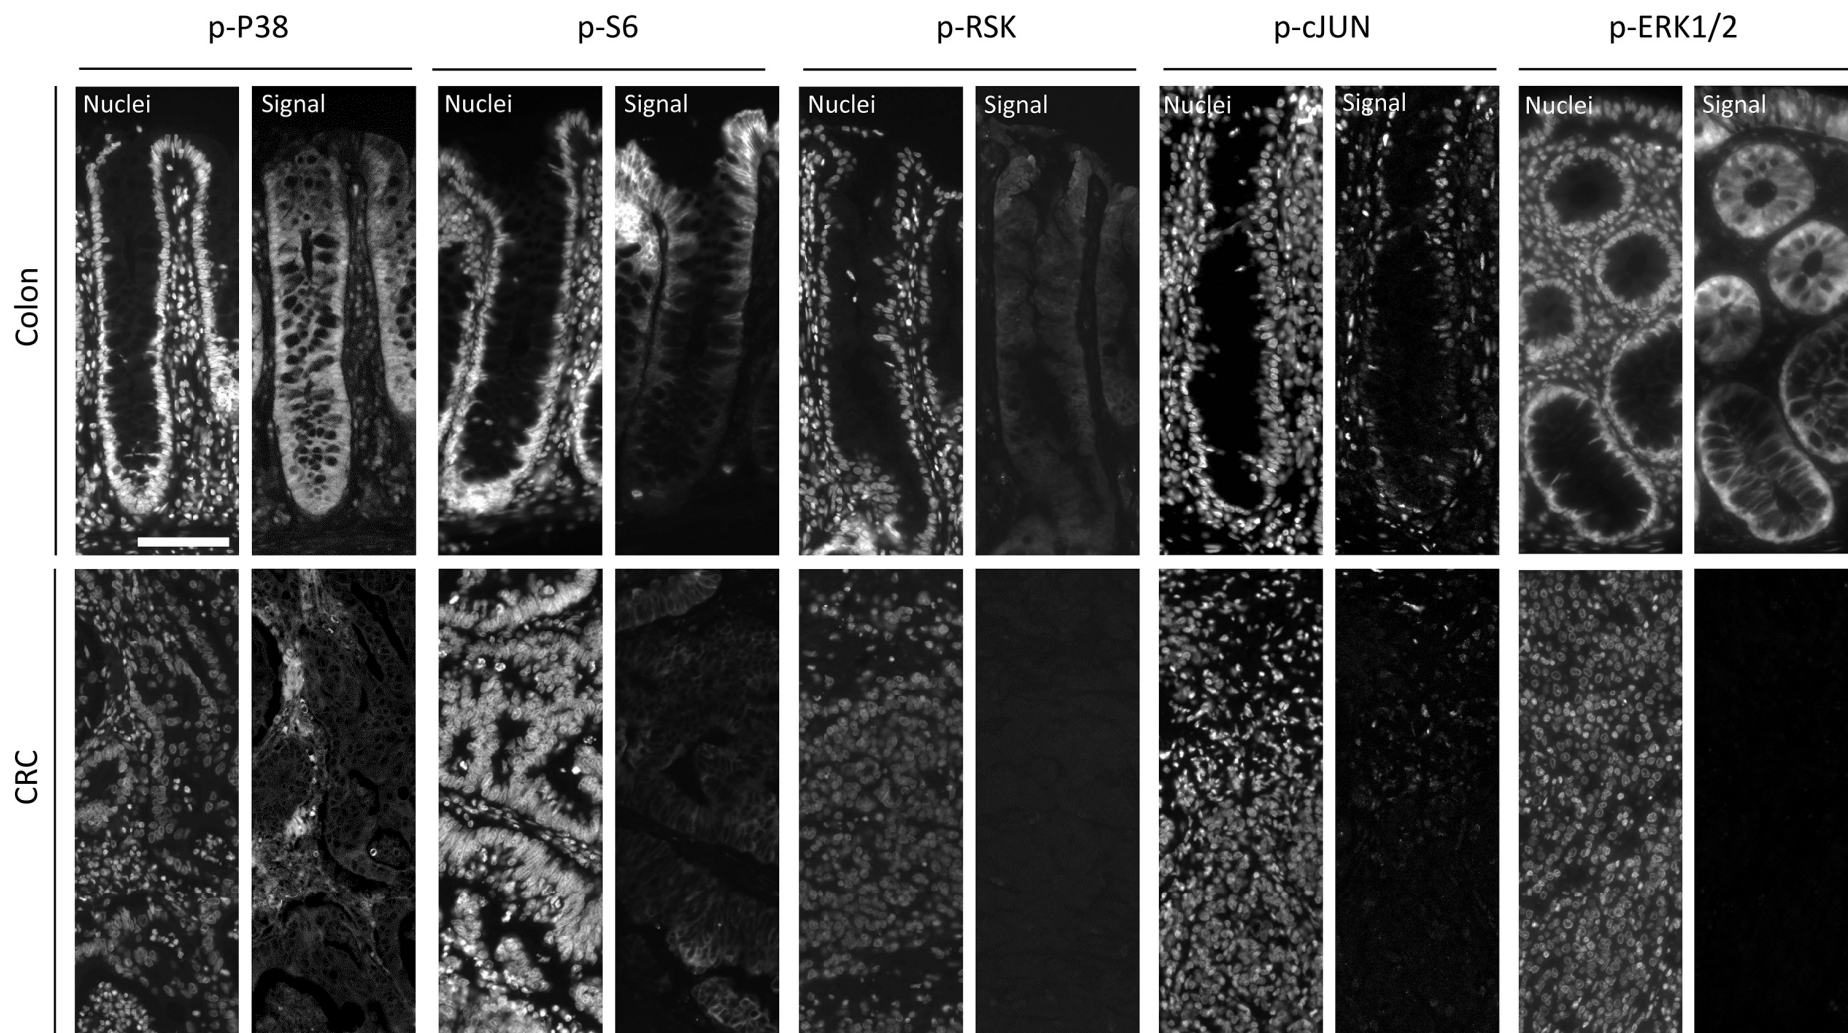

**Fig. S11. Signaling in human normal colon and CRC.** Immunofluorescence imaging of p-P38, p-S6, p-P90RSK, p-cJUN, and p-ERK1/2 in human colon and CRC FFPE samples, with full representation of the surface-to-crypt axis. Left = nuclei, right = signals. Scale bars, 100  $\mu$ m. Data representative of  $n > 6$  human patient samples for each group (colon, MSS-CRC, MSI-CRC).

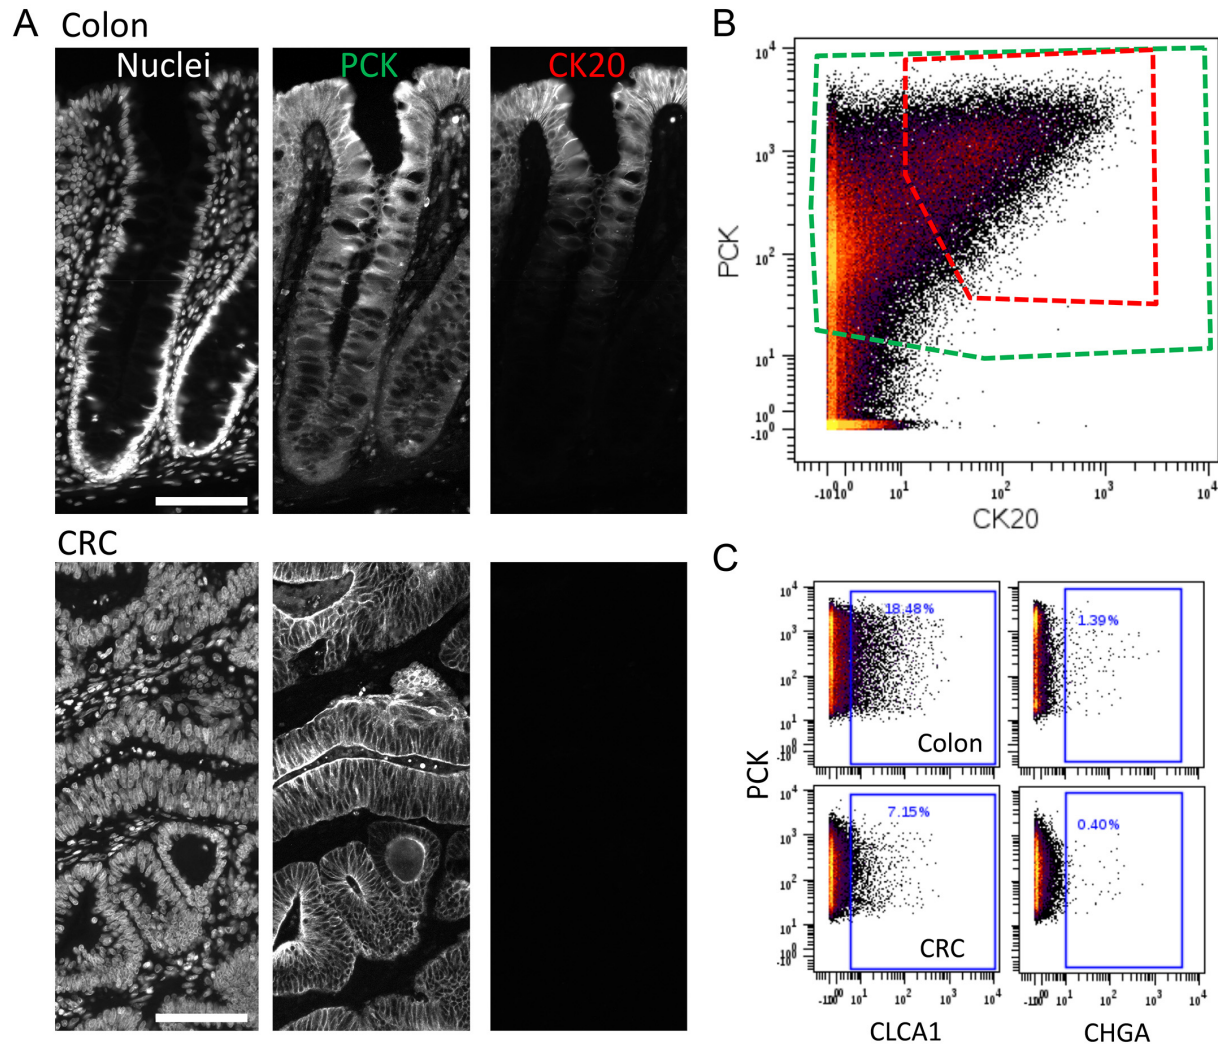

**Fig. S12. Differentiation in human normal colon and CRC.** (A) IF imaging of PCK, which marks all epithelial cells, and CK20, which marks differentiated epithelial cells in normal colon and CRC. Scale bars, 100  $\mu$ m. (B) Mass cytometry-generated bi-plot of PCK vs. CK20 abundances in normal colonic cells overlaid with cell density. Schematic of epithelial (tumor) cell gating by PCK (green) and CK20 (red) for further analysis. (C) Manual gating of goblet cells by CLCA1 and enteroendocrine cells by CHGA for normal colon and CRC. Data representative of  $n > 6$  human patient samples for each group (colon, MSS-CRC, MSI-CRC).

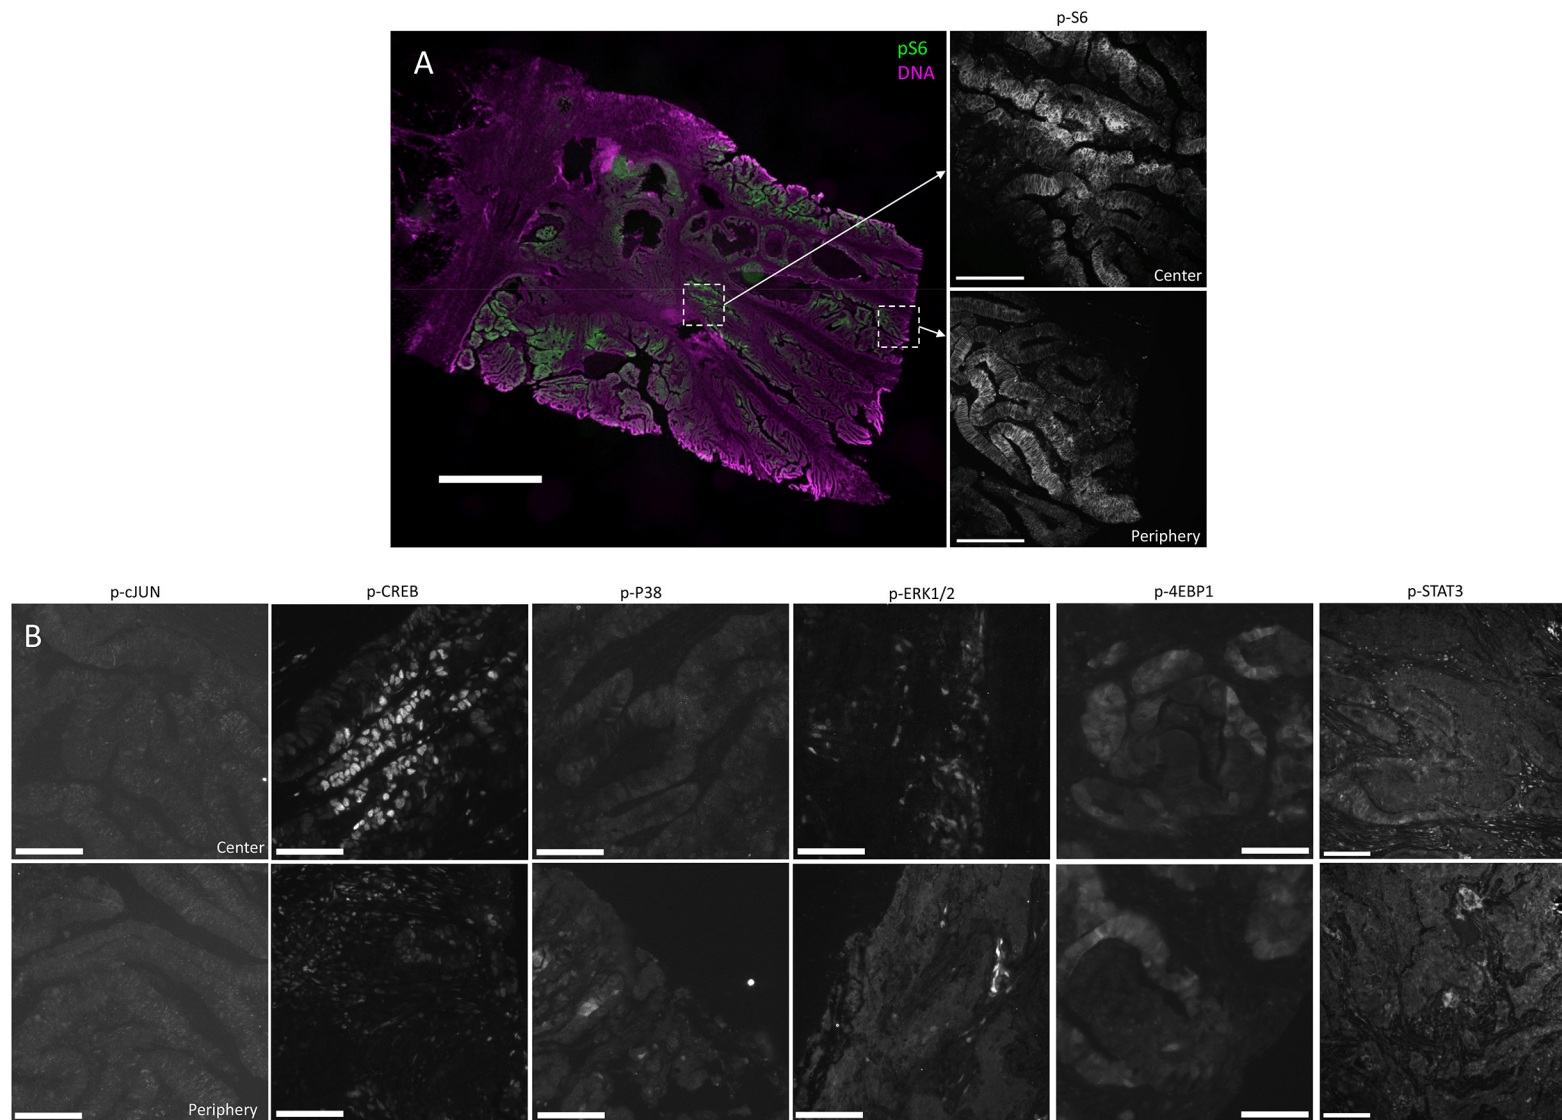

**Fig. S13. Evidence of fixative penetration. (A)** Demonstration of IF imaging of whole tumors at the periphery or center for p-S6. Scale bars, 2 mm for low magnification image, and 100  $\mu$ m for insets. **(B)** Representative images of signaling markers detected at the periphery and the center of the same tumors. Scale bars, 100  $\mu$ m. Data representative of n=13 tumor samples.



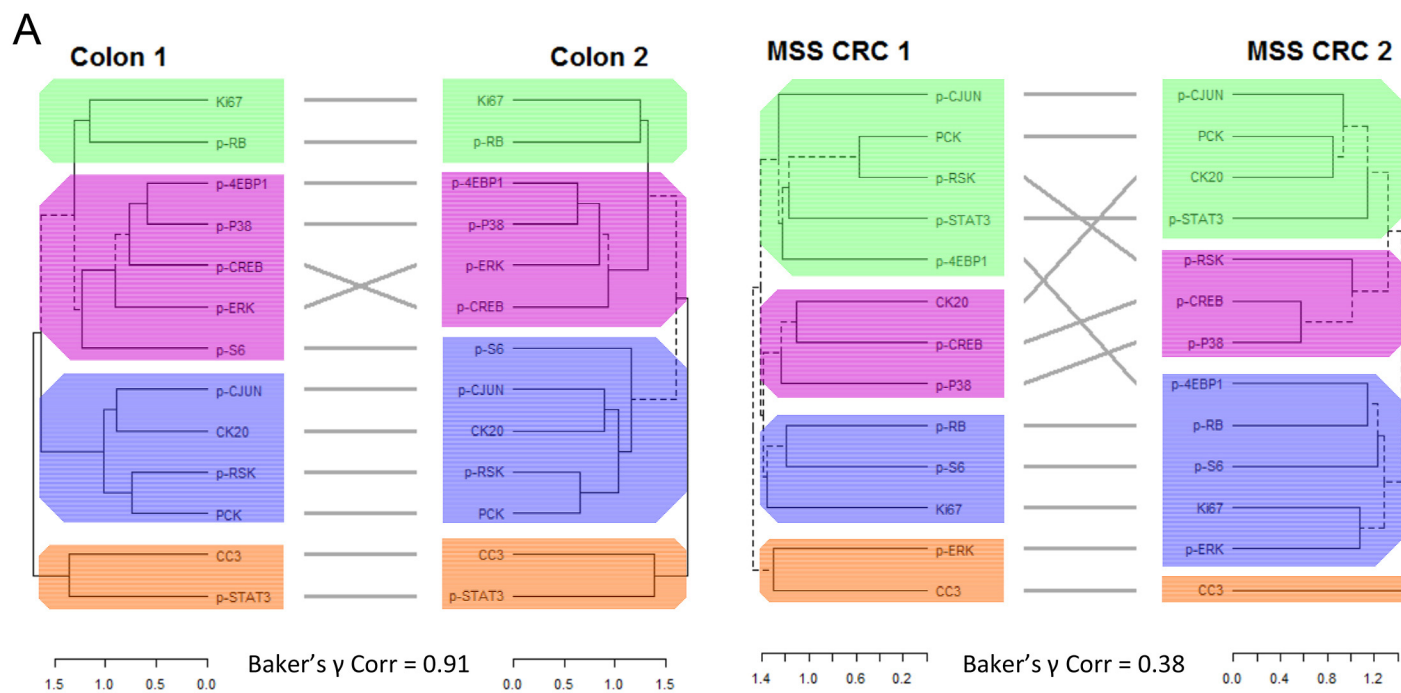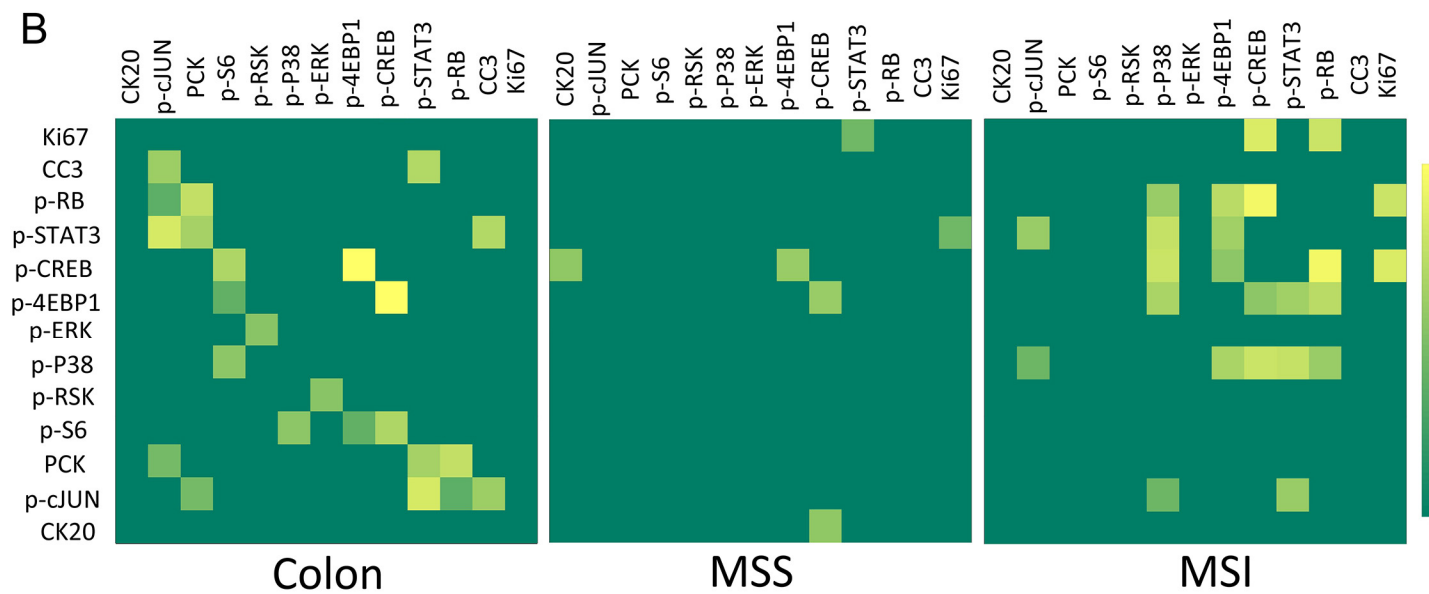

**Fig. S14. Analysis of the organization of signaling pathways in human specimens. (A)** Pairwise comparisons between hierarchical clustering trees with calculated Baker's gamma correlation coefficient for normal colon and MSS CRC. Colored blocks represent signaling modules as determined by clustering on signaling markers. **(B)** Heatmaps generated by pairwise correlations between signaling markers calculated over all samples, disregarding single-cell data but instead using the median values generated from single-cell distributions. Heat represents correlation  $>0.7$ . Data representative of  $n>6$  human patient samples for each group (colon, MSS-CRC, MSI-CRC).

| <b>Epitope</b>       | <b>Clone</b> |
|----------------------|--------------|
| CKAE1/3              | CKAE1/AE3    |
| p-4EBP1 (T37/46)     | 236B4        |
| p-RB (S807/811)      | D20B12       |
| p-S6 (S240/244)      | D68F8        |
| p-ATF2 (T71)         | 11G2         |
| p-P38 (T180/Y182)    | D3F9         |
| p-STAT3 (Y705)       | D3A7         |
| p-CJUN (S73)         | D47G9        |
| p-RSK (T359/S363)    | D1E9         |
| p-CREB (S133)        | 87G3         |
| p-ERK1/2 (T202/Y204) | D13.14.4E    |
| p-EGFR (Y1068)       | D7A5         |
| ChrgA                | Polyclonal   |
| CLCA1                | EPR12254-88  |
| C-Caspase 3 (N-175)  | Polyclonal   |

**Table S1. Mouse antibody reagent panel.** Antibodies and their clone names used for evaluating specific markers in mouse mass cytometry studies.

| ID    | Age | Sex | Metastatic | Stage | Grade | KRAS | BRAF  | MSI status | Tumor Site                | PET (h) |
|-------|-----|-----|------------|-------|-------|------|-------|------------|---------------------------|---------|
| 33468 | 57  | M   | Yes        | IIIC  | G2    | U    | U     | MSS        | Sigmoid                   | 1       |
| 33469 | 75  | M   | No         | II    | G2    | U    | U     | MSS        | Cecum and ileocecal valve | 0.5     |
| 33470 | 56  | F   | Yes        | IV    | G3    | G12V | WT    | MSS        | Cecum                     | 1       |
| 33471 | 81  | F   | No         | IIA   | G2    | U    | V600E | MSI-H      | Left colon                | 0.5     |
| 33472 | 47  | M   | Yes        | III   | G3    | U    | V600E | MSI-H      | Cecum                     | 0.5     |
| 33473 | 80  | M   | U          | IIA   | G2    | WT   | WT    | MSS        | Sigmoid colon             | 0.5     |
| 33474 | 78  | F   | U          | IIA   | G2    | U    | V600E | MSI-H      | Hepatic flexure           | 0.5     |
| 33475 | 58  | M   | Yes        | IIIB  | G2    | U    | U     | MSS        | Right colon               | 0.5     |
| 33476 | 65  | M   | Yes        | IV    | U     | U    | WT    | MSI-H      | Cecum                     | 0.75    |
| 33478 | 35  | M   | Yes        | IIIC  | G2    | WT   | U     | MSS        | Sigmoid colon             | 0.5     |
| 33479 | 40  | M   | U          | IIA   | G2    | U    | WT    | MSI-H      | Hepatic flexure           | 0.5     |
| 33482 | 71  | M   | Yes        | IIIC  | G2    | G12C | WT    | MSS        | Lower pole                | 0.5     |
| 33483 | 82  | M   | Yes        | IIIB  | G3    | U    | V600E | MSI-H      | Right colon               | 0.5     |

**Table S2. Summary pathological characteristics of human colon cancer samples.** A collection of CRC samples used for human studies with characteristics of patient age and sex, presence of metastasis, stage and grade of CRC, *KRAS* and *BRAF* mutation status, MSI status, site of tumor, and post-excision time in hours (PET).

| <b>Epitope</b>       | <b>Clone</b> |
|----------------------|--------------|
| CK18                 | C-04         |
| CD117 (KIT)          | 104D2        |
| p-EGFR (Y1068)       | D7A5         |
| p-4EBP1 (T37/46)     | 236B4        |
| p-RB (S807/811)      | D20B12       |
| p-S6 (S240/244)      | D68F8        |
| CD8                  | C8/144B      |
| Vimentin             | D21H3        |
| p-P38 (T180/Y182)    | D3F9         |
| p-CJUN (S73)         | D47G9        |
| p-STAT3 (Y705)       | D3A7         |
| p-RSK (T359/S363)    | D1E9         |
| Pan-CK               | C11          |
| p-CREB (S133)        | 87G3         |
| p-ERK1/2 (T202/Y204) | D13.14.4E    |
| Ki-67                | B56          |
| CHGA                 | Polyclonal   |
| CK20                 | D9Z1Z        |
| CLCA1                | EPR12254-88  |
| C-Caspase 3 (N-175)  | Polyclonal   |

**Table S3. Human antibody reagent panel.** Antibodies and their clone names used for evaluating specific markers in human mass cytometry studies.
